# Supplementary material
Source: ML conference proceedings conference paper supplement (https://openaccess.thecvf.com/content/CVPR2021/html/Li_Hilbert_Sinkhorn_Divergence_CVPR_2021_paper.html)
Supplement: Supplementary file 1 [file Li_Hilbert_Sinkhorn_Divergence_CVPR_2021_supplemental.pdf]

# Hilbert Sinkhorn Divergence for Optimal Transport Supplementary

Qian Li<sup>1\*</sup>    Zhichao Wang<sup>2\*†</sup>    Gang Li<sup>3</sup>    Jun Pang<sup>4</sup>    Guandong Xu<sup>1</sup>

<sup>1</sup> Faculty of Engineering and Information Technology, University of Technology Sydney, Australia

<sup>2</sup> School of Electrical Engineering and Telecommunications, University of New South Wales, Australia

<sup>3</sup> Centre for Cyber Security Research and Innovation, Deakin University, Geelong, VIC 3216, Australia

<sup>4</sup> Faculty of Science, Technology and Medicine, University of Luxembourg

{qian.li, guandong.xu}@uts.edu.au, zchaoking@gmail.com, gang.li@deakin.edu.au, jun.pang@uni.lu

In this supplementary material, we provide the proofs of all theorems and propositions in the paper.

**Definition 1** (Hilbert Sinkhorn divergence, HSD). *Given measures  $\mu, \nu \in \mathbb{P}(\mathcal{X})$  and elements  $u, v \in \mathcal{H}$ , the Hilbert Sinkhorn divergence between embedding  $\phi_*\mu$  and  $\phi_*\nu$  is written as*

$$\mathcal{S}_\epsilon(\phi_*\mu, \phi_*\nu) = \inf_{\pi_\phi} \int_{\mathcal{H} \times \mathcal{H}} c_\phi(u, v) d\pi_\phi(u, v) + \epsilon \Phi(\pi_\phi) \quad (1)$$

where  $\pi_\phi \in \Pi(\phi_*\mu, \phi_*\nu)$  is a joint probability measure with two marginals  $\phi_*\mu$  and  $\phi_*\nu$ , and

$$c_\phi(u, v) = \|u - v\|_{\mathcal{H}}^2$$

$$\Phi(\pi_\phi) = \log \left( \frac{d\pi_\phi}{d(\phi_*\mu) d(\phi_*\nu)}(u, v) \right)$$

**Definition 2** (Hilbert embedding). *Let  $\mathbb{P}(\mathcal{X})$  be the set of probability measures on sample set  $\mathcal{X}$  and  $\mathbb{P}(\mathcal{H})$  be the set of probability measures on reproducing kernel Hilbert space  $\mathcal{H}$ . Given a probability measure  $\mu \in \mathbb{P}(\mathcal{X})$ , the implicit feature map  $\phi : \mathcal{X} \rightarrow \mathcal{H}$  will induce the Hilbert embedding of  $\mu$ :*

$$\phi_* : \mathbb{P}(\mathcal{X}) \rightarrow \mathbb{P}(\mathcal{H}), \mu \mapsto \phi_*\mu = \int_{\mathcal{X}} \phi(x) d\mu(x) \quad (2)$$

For the map  $(\phi, \phi) : \mathcal{X} \times \mathcal{X} \rightarrow \mathcal{H} \times \mathcal{H}$ , we similarly have

$$(\phi, \phi)_* : (\mu, \nu) \mapsto (\phi_*\mu, \phi_*\nu) \quad (3)$$

**Definition 3** (Hilbert Sinkhorn divergence). *Given measures  $\mu, \nu \in \mathbb{P}(\mathcal{X})$  and elements  $u, v \in \mathcal{H}$ , the Hilbert Sinkhorn divergence between embedding  $\phi_*\mu$  and  $\phi_*\nu$  is written as*

$$\mathcal{S}_\epsilon(\phi_*\mu, \phi_*\nu) = \inf_{\pi_\phi} \int_{\mathcal{H} \times \mathcal{H}} c_\phi(u, v) d\pi_\phi(u, v) + \epsilon \Phi(\pi_\phi) \quad (4)$$

where  $\pi_\phi \in \Pi(\phi_*\mu, \phi_*\nu)$  is a joint probability measure with two marginals  $\phi_*\mu$  and  $\phi_*\nu$ , and

$$c_\phi(u, v) = \|u - v\|_{\mathcal{H}}^2$$

$$\Phi(\pi_\phi) = \log \left( \frac{d\pi_\phi}{d(\phi_*\mu) d(\phi_*\nu)}(u, v) \right)$$

**Definition 4.** *Given measurable spaces  $(X_1, \Sigma_1)$  and  $(X_2, \Sigma_2)$ , a measurable mapping  $f : X_1 \rightarrow X_2$  and a measure  $\mu : \Sigma_1 \rightarrow [0, +\infty]$ , the pushforward of  $\mu$  is defined to be the measure  $f_*(\mu) : \Sigma_2 \rightarrow [0, +\infty]$  given by*

$$(f_*(\mu))(B) = \mu(f^{-1}(B)) \text{ for } B \in \Sigma_2 \quad (5)$$

---

\*Equal contribution

†Corresponding author

## 1. Proving Theorem 1

**Theorem 1.** Given two measures  $\mu, \nu \in \mathbb{P}(\mathcal{X})$ , we write

$$\mathcal{S}_{\mathcal{H},\epsilon}(\mu, \nu) = \inf_{\pi} \int_{\mathcal{X} \times \mathcal{X}} c_{\mathcal{H}}(x, y) d\pi(x, y) + \epsilon H(\pi) \quad (6)$$

where  $\pi \in \Pi(\mu, \nu)$  is the joint probability measure on  $\mathcal{X} \times \mathcal{X}$  with marginals  $\mu$  and  $\nu$ , and

$$c_{\mathcal{H}}(x, y) = \|\phi(x) - \phi(y)\|_{\mathcal{H}}^2 = k(x, x) + k(y, y) - 2k(x, y)$$

$$H(\pi) = \log \left( \frac{d\pi}{d\mu d\nu}(x, y) \right)$$

Then we have the following conclusions:

- $\mathcal{S}_{\mathcal{H},\epsilon}(\mu, \nu) = \mathcal{S}_{\epsilon}(\phi_*\mu, \phi_*\nu)$
- If  $\pi^*$  is a minimizer of (6), its Hilbert embedding  $(\phi, \phi)_*\pi^*$  is a minimizer of (4).

*Proof.* Applying the pushforward map in (5), we have  $((\phi, \phi)_*\pi)(u, v) = \pi(\phi^{-1}(u), \phi^{-1}(v)) = \pi(x, y)$ . Thus, the HSD is reformulated as

$$\begin{aligned} \mathcal{S}_{\mathcal{H},\epsilon}(\mu, \nu) &= \inf_{\pi \in \Pi(\mu, \nu)} \int_{\mathcal{X} \times \mathcal{X}} \|\phi(x) - \phi(y)\|_{\mathcal{H}}^2 d\pi(x, y) + \epsilon \log \left( \frac{d\pi}{d\mu d\nu}(x, y) \right) \\ &= \inf_{\pi \in \Pi(\mu, \nu)} \int_{\mathcal{H} \times \mathcal{H}} (\|u - v\|_{\mathcal{H}}^2) d(\phi, \phi)_*\pi(u, v) + \epsilon \log \left( \frac{d(\phi, \phi)_*\pi}{d(\phi_*\mu) d(\phi_*\nu)}(u, v) \right) \\ &= \inf_{\pi \in \Pi(\mu, \nu)} \int_{\mathcal{H} \times \mathcal{H}} (\|u - v\|_{\mathcal{H}}^2) d\pi_{\phi}(u, v) + \epsilon \log \left( \frac{d\pi_{\phi}}{d(\phi_*\mu) d(\phi_*\nu)}(u, v) \right) \\ &\geq \inf_{\pi_{\phi} \in \Pi(\phi_*\mu, \phi_*\nu)} \int_{\mathcal{H} \times \mathcal{H}} (\|u - v\|_{\mathcal{H}}^2) d\pi_{\phi}(u, v) + \epsilon \log \left( \frac{d\pi_{\phi}}{d(\phi_*\mu) d(\phi_*\nu)}(u, v) \right) \\ &= \mathcal{S}_{\epsilon}(\phi_*\mu, \phi_*\nu) \end{aligned} \quad (7)$$

on the other hand, for all  $\pi \in \Pi(\mu, \nu)$ ,

$$\begin{aligned} &\int_{\mathcal{H} \times \mathcal{H}} (\|u - v\|_{\mathcal{H}}^2) d\pi_{\phi}(u, v) + \epsilon \log \left( \frac{d\pi_{\phi}}{d(\phi_*\mu) d(\phi_*\nu)}(u, v) \right) \\ &= \int_{\mathcal{H} \times \mathcal{H}} \left( \|u - v\|_{\mathcal{H}}^2 + \epsilon \log \left( \frac{d(\phi, \phi)_*\pi}{d(\phi_*\mu) d(\phi_*\nu)}(u, v) \right) \right) d(\phi, \phi)_*\pi(u, v) \\ &= \int_{\mathcal{X} \times \mathcal{X}} (\|\phi(x) - \phi(y)\|_{\mathcal{H}}^2) d\pi(x, y) + \epsilon \log \left( \frac{d\pi}{d\mu d\nu}(x, y) \right) \\ &\geq \inf_{\pi \in \Pi(\mu, \nu)} \int_{\mathcal{X} \times \mathcal{X}} (\|\phi(x) - \phi(y)\|_{\mathcal{H}}^2) d\pi(x, y) + \epsilon \log \left( \frac{d\pi}{d\mu d\nu}(x, y) \right) \\ &= \mathcal{S}_{\mathcal{H},\epsilon}(\mu, \nu) \end{aligned} \quad (8)$$

Take the infimum on  $\pi_{\phi} \in \Pi(\phi_*\mu, \phi_*\nu)$  over domain  $\mathcal{H} \times \mathcal{H}$ , the inequality (8) remains hold. That is  $\mathcal{S}_{\epsilon}(\phi_*\mu, \phi_*\nu) \geq \mathcal{S}_{\mathcal{H},\epsilon}(\mu, \nu)$ . Therefore, combining (7) and (8) achieves

$$\mathcal{S}_{\epsilon}(\phi_*\mu, \phi_*\nu) = \mathcal{S}_{\mathcal{H},\epsilon}(\mu, \nu) \quad (9)$$

If  $\pi^*$  is a minimizer of (6), then

$$\begin{aligned} &\mathcal{S}_{\mathcal{H},\epsilon}(\mu, \nu) \\ &= \int_{\mathcal{X} \times \mathcal{X}} \|\phi(x) - \phi(y)\|_{\mathcal{H}}^2 d\pi^*(x, y) + \epsilon \log \left( \frac{d\pi^*}{d\mu d\nu}(x, y) \right) \\ &= \int_{\mathcal{H} \times \mathcal{H}} (\|u - v\|_{\mathcal{H}}^2) d(\phi, \phi)_*\pi^*(u, v) + \epsilon \log \left( \frac{d(\phi, \phi)_*\pi^*}{d(\phi_*\mu) d(\phi_*\nu)}(u, v) \right) \\ &= \mathcal{S}_{\epsilon}(\phi_*\mu, \phi_*\nu) \end{aligned} \quad (10)$$

which implies that  $(\phi, \phi)_* \pi^*$  is a minimizer of (4).  $\square$

## 2. Proving Proposition 1

**Proposition 1** (Variational representation). *The KL divergence admits the following variational representation in the reproducing kernel Hilbert space:*

$$\mathcal{S}_\epsilon(\phi_*\mu, \phi_*\nu) = \epsilon \left( 1 + \min_{\pi_\phi} \mathbb{E}_{\pi_\phi}[T] - \log(\mathbb{E}_{\xi_\phi}[e^T]) \right) \quad (11)$$

where the infimum is taken over  $\pi_\phi \in \Pi(\phi_*\mu, \phi_*\nu)$ ,  $\xi_\phi(x, y) = e^{-d(x, y)/\epsilon}$  and function  $T = \log \frac{d\pi_\phi}{d\xi_\phi} + C$  for some constant  $C \in \mathbb{R}$ .

*Proof. Step 1:* Given an absolutely continuous measure  $\pi_\phi \in \mathbb{P}(\mathcal{H} \times \mathcal{H})$  and a positive function  $\xi_\phi$  on  $\mathcal{H} \times \mathcal{H}$ , we define the Kullback-Leibler (KL) divergence

$$\text{KL}(\pi_\phi \mid \xi_\phi) = \int_{\mathcal{H} \times \mathcal{H}} \pi(u, v) \left[ \ln \frac{\pi(u, v)}{\xi(u, v)} - 1 \right] dudv \quad (12)$$

We can associate  $\|u - v\|_{\mathcal{H}}^2$  to a Gibbs distribution

$$\xi_\phi(u, v) = e^{-\|u - v\|_{\mathcal{H}}^2/\epsilon}, \text{ then } \|u - v\|_{\mathcal{H}}^2 = -\epsilon \ln \xi_\phi(u, v) \quad (13)$$

By combining KL divergence (12) and Gibbs distribution (13) algebraically, Hilbert Sinkhorn divergence (4) can be computed as the smallest KL divergence between coupling  $\pi_\phi$  and Gibbs distribution  $\xi_\phi$  in the reproducing kernel Hilbert space:

$$\mathcal{S}_\epsilon(\phi_*\mu, \phi_*\nu) = \epsilon \left( 1 + \min_{\pi_\phi \in \Pi(\phi_*\mu, \phi_*\nu)} : \text{KL}(\pi_\phi \mid \xi_\phi) \right) \quad (14)$$

**Step 2.** We use Donsker-Varadhan representation for KL divergence

$$\text{KL}(\pi_\phi \mid \xi_\phi) = \sup_{T: \mathcal{H} \times \mathcal{H} \rightarrow \mathbb{R}} \mathbb{E}_{\pi_\phi}[T] - \log(\mathbb{E}_{\xi_\phi}[e^T]) \quad (15)$$

A simple proof of (15) is as follows: for a given function  $T$ , let us consider the Gibbs distribution  $\mathbb{G}$  defined by  $d\mathbb{G} = \frac{1}{Z} e^T d\xi_\phi$ , where  $Z = \mathbb{E}_{\xi_\phi}[e^T]$ . By construction

$$\mathbb{E}_{\pi_\phi}[T] - \log Z = \mathbb{E}_{\pi_\phi} \left[ \log \frac{d\mathbb{G}}{d\xi_\phi} \right] \quad (16)$$

Let  $\Delta$  be the gap,

$$\Delta := \text{KL}(\pi_\phi \mid \xi_\phi) - (\mathbb{E}_{\pi_\phi}[T] - \log(\mathbb{E}_{\xi_\phi}[e^T])) \quad (17)$$

Using Eq. (16), we can write  $\Delta$  as the KL-divergence:

$$\Delta = \mathbb{E}_{\pi_\phi} \left[ \log \frac{d\pi_\phi}{d\xi_\phi} - \log \frac{d\mathbb{G}}{d\xi_\phi} \right] = \mathbb{E}_{\pi_\phi} \log \frac{d\pi_\phi}{d\mathbb{G}} = \text{KL}(\pi_\phi \parallel \mathbb{G}) \quad (18)$$

For KL-divergence, we have  $\Delta \geq 0$  in (17). Thus, it can be shown that for any  $T$ ,

$$\text{KL}(\pi_\phi \parallel \xi_\phi) \geq \mathbb{E}_{\pi_\phi}[T] - \log(\mathbb{E}_{\xi_\phi}[e^T]) \quad (19)$$

and the inequality also holds for taking the supremum on the right side. Finally, the identity (18) also shows that  $\Delta = 0$  whenever  $\mathbb{G} = \pi_\phi$ , i.e, optimal functions  $T$  has the form

$$T = \log \frac{d\pi_\phi}{d\xi_\phi} + C \quad (20)$$

for some constant  $C \in \mathbb{R}$ . Combining (14), (15) and (20), we achieve the conclusion.  $\square$

### 3. Proving Proposition 2

**Proposition 2** (Lower bound). *The Hilbert Sinkhorn distance has the following lower bound:*

$$\mathcal{S}_\epsilon(\phi_*\mu, \phi_*\nu) \geq \epsilon \left( 1 + \min_{\pi \in \Pi(\mu, \nu)} \mathbb{E}_\pi[k] - \log(\mathbb{E}_\xi[e^k]) \right)$$

where  $\epsilon > 0$ ,  $\phi_*\mu$  and  $\phi_*\nu$  are Hilbert embedding in Eq. (2) and  $k$  is a kernel function.

*Proof.* KL divergence (15) in product space  $\mathcal{H} \times \mathcal{H}$  satisfies

$$\begin{aligned} \text{KL}(\pi_\phi | \xi_\phi) &= \sup_{T: \mathcal{H} \times \mathcal{H} \rightarrow \mathbb{R}} \mathbb{E}_{\pi_\phi}[T] - \log(\mathbb{E}_{\xi_\phi}[e^T]) \\ &= \sup_{T: \mathcal{H} \times \mathcal{H} \rightarrow \mathbb{R}} \int_{\mathcal{H} \times \mathcal{H}} T(u, v) d\pi_\phi(u, v) - \log \int_{\mathcal{H} \times \mathcal{H}} e^T d\xi_\phi(u, v) \\ &= \sup_{T: \mathcal{H} \times \mathcal{H} \rightarrow \mathbb{R}} \int_{\mathcal{H} \times \mathcal{H}} T(u, v) d((\phi, \phi)_*\pi)(u, v) - \log \int_{\mathcal{H} \times \mathcal{H}} e^{T(u, v)} d((\phi, \phi)_*\xi)(u, v) \\ &\stackrel{(5)}{=} \sup_{T: \mathcal{H} \times \mathcal{H} \rightarrow \mathbb{R}} \int_{\Omega \times \Omega} T(\phi(x), \phi(y)) d\pi(x, y) - \log \int_{\Omega \times \Omega} e^{T(\phi(x), \phi(y))} d\xi \end{aligned} \quad (21)$$

Let the set of inner products be  $\mathcal{M} = \{\langle \cdot, \cdot \rangle : \mathcal{H} \times \mathcal{H} \rightarrow \mathbb{R}\}$ . Clearly,  $\mathcal{M} \subseteq \{T : \mathcal{H} \times \mathcal{H} \rightarrow \mathbb{R}\}$  for all functional maps  $T$  define on  $\mathcal{H} \times \mathcal{H}$ . If functional map  $T \in \mathcal{M}$ , then we have  $T(\phi(x), \phi(y)) = \langle \phi(x), \phi(y) \rangle = k(x, y)$  where  $k : \mathcal{X} \times \mathcal{X} \rightarrow \mathbb{R}$  is a kernel function. Hence, we continue (21) to get

$$\begin{aligned} &\geq \sup_{T \in \mathcal{M}} \int_{\Omega \times \Omega} T(\phi(x), \phi(y)) d\pi(x, y) - \log \int_{\Omega \times \Omega} e^{T(\phi(x), \phi(y))} d\xi(x, y) \\ &= \sup_k \int_{\Omega \times \Omega} k(x, y) d\pi(x, y) - \log \int_{\Omega \times \Omega} e^{K(x, y)} d\xi(x, y) \\ &= \sup_{K: \mathcal{X} \times \mathcal{X} \rightarrow \mathbb{R}} \mathbb{E}_\pi[k] - \log(\mathbb{E}_\xi[e^k]) \end{aligned} \quad (22)$$

By (22) and (14), given a kernel function  $k$  we have the lower bound

$$\begin{aligned} \mathcal{S}_\epsilon(\phi_*\mu, \phi_*\nu) &= \epsilon \left( 1 + \min_{\pi_\phi \in \pi_\phi} \text{KL}(\pi_\phi | \xi_\phi) \right) \\ &\geq \epsilon \left( 1 + \min_{\pi \in \Pi} \sup_{k: \mathcal{X} \times \mathcal{X} \rightarrow \mathbb{R}} \mathbb{E}_\pi[k] - \log(\mathbb{E}_\xi[e^k]) \right) \\ &\geq \epsilon \left( 1 + \min_{\pi \in \Pi} \mathbb{E}_\pi[k] - \log(\mathbb{E}_\xi[e^k]) \right) \end{aligned} \quad (23)$$

□

Since  $\mathcal{S}_{\mathcal{H}, \epsilon}(\mu, \nu) = \mathcal{S}_\epsilon(\phi_*\mu, \phi_*\nu)$  as provided in Theorem 1. As a consequence, we directly have the following result by using Proposition 1 and 2.

**Corollary 1.** *The reformulation (6) admits the following variational representation and lower bound:*

$$\begin{aligned} \mathcal{S}_{\mathcal{H}, \epsilon}(\mu, \nu) &= \epsilon \left( 1 + \min_{\pi_\phi} \mathbb{E}_{\pi_\phi}[T] - \log(\mathbb{E}_{\xi_\phi}[e^T]) \right) \\ \mathcal{S}_{\mathcal{H}, \epsilon}(\mu, \nu) &\geq \epsilon \left( 1 + \min_{\pi \in \Pi(\mu, \nu)} \mathbb{E}_\pi[k] - \log(\mathbb{E}_\xi[e^k]) \right) \end{aligned}$$

The related notations are defined in Prop 1 and 2.

## 4. Proving Theorem 2

**Theorem 2** (Strong consistency). *Given empirical measures  $\mu_n, \nu_n$  and  $\epsilon, \eta > 0$ , there exists  $N > 0$  such that*

$$\forall n \geq N, \mathbb{P}(|\mathcal{S}_{\mathcal{H},\epsilon}(\mu_n, \nu_n) - \mathcal{S}_{\mathcal{H},\epsilon}(\mu, \nu)| \leq \epsilon\eta) = 1 \quad (24)$$

*Proof.* We assume that  $\pi_\phi$  is the optimal of problem (14), and  $\pi_{\phi,n}$  is the optimal of problem

$$\mathcal{S}_{\mathcal{H},\epsilon}(\mu_n, \nu_n) = \epsilon \left( 1 + \min_{\pi_{\phi,n} \in \Pi_{\phi,n}} : \text{KL}(\pi_{\phi,n} \mid \xi_{\phi,n}) \right) \quad (25)$$

Then we start by using (15) and the triangular inequality to write,

$$|\mathcal{S}_{\mathcal{H},\epsilon}(\mu_n, \nu_n) - \mathcal{S}_{\mathcal{H},\epsilon}(\mu, \nu)| \leq \epsilon \left( \sup_{T: \mathcal{H} \times \mathcal{H} \rightarrow \mathbb{R}} |\mathbb{E}_{\pi_{\phi,n}}[T] - \mathbb{E}_{\pi_\phi}[T]| + \sup_{T: \mathcal{H} \times \mathcal{H} \rightarrow \mathbb{R}} |\log(\mathbb{E}_{\xi_\phi}[e^T]) - \log(\mathbb{E}_{\xi_{\phi,n}}[e^T])| \right) \quad (26)$$

It is reasonable to assume that functions  $T$  are uniformly bounded by a constant  $M$ , i.e  $\|T\|_{\mathcal{H}} \leq M$  in reproducing kernel Hilbert space. Since  $\log$  is Lipschitz continuous with constant  $e^M$  in the interval  $[e^{-M}, e^M]$ , we have

$$|\log(\mathbb{E}_{\xi_\phi}[e^T]) - \log(\mathbb{E}_{\xi_{\phi,n}}[e^T])| \leq e^M |\mathbb{E}_{\xi_\phi}[e^T] - \mathbb{E}_{\xi_{\phi,n}}[e^T]| \quad (27)$$

The families of functions  $T$  and  $e^T$  satisfy the uniform law of large numbers [3][5][4]. Given  $\eta > 0$ , we can thus choose  $N \in \mathbb{N}$  such that  $\forall n \geq N$  and with probability one,

$$\sup_{T: \mathcal{H} \times \mathcal{H} \rightarrow \mathbb{R}} |\mathbb{E}_{\pi_{\phi,n}}[T] - \mathbb{E}_{\pi_\phi}[T]| \leq \frac{\eta}{2} \quad \text{and} \quad \sup_{T: \mathcal{H} \times \mathcal{H} \rightarrow \mathbb{R}} |\log(\mathbb{E}_{\xi_\phi}[e^T]) - \log(\mathbb{E}_{\xi_{\phi,n}}[e^T])| \leq \frac{\eta}{2} e^{-M} \quad (28)$$

Substituting Eqs. (28) and (28) into (26) leads to

$$\forall n \geq N, \quad |\mathcal{S}_{\mathcal{H},\epsilon}(\mu_n, \nu_n) - \mathcal{S}_{\mathcal{H},\epsilon}(\mu, \nu)| \leq \frac{\epsilon\eta}{2} + \frac{\epsilon\eta}{2} = \epsilon\eta \quad (29)$$

with probability one.  $\square$

## 5. Proving Proposition 3

**Proposition 3** (approximation error). *Let sample space  $\mathcal{X}$  be a subset of  $\mathbb{R}^d$  and diameter be  $|\mathcal{X}| = \sup\{\|x - y\| \mid x, y \in \mathcal{X}\}$ , we have*

$$\begin{aligned} |\mathcal{S}_{\mathcal{H},\epsilon}(\mu, \nu) - \mathcal{W}_\epsilon(\mu, \nu)| &\leq \epsilon\eta \\ |\mathcal{S}_{\mathcal{H},\epsilon}(\mu, \nu) - \mathcal{W}(\mu, \nu)| &\leq \epsilon \left( \eta + 2d \log \frac{e^2 L D}{\sqrt{d\epsilon}} \right) \end{aligned} \quad (30)$$

where  $\epsilon > 0$ ,  $D \geq |\mathcal{X}|$  and  $L$  is a Lipschitz constant.

*Proof.* **Step 1.** Notice that we can follow the idea of Proposition 1 to construct the following representation in Euclidean space

$$\mathcal{W}_\epsilon(\mu, \nu) = \epsilon \left( 1 + \min_{\pi \in \Pi(\mu, \nu)} \mathbb{E}_\pi[T] - \log(\mathbb{E}_\xi[e^T]) \right) \quad (31)$$

where  $\xi(x, y) = e^{-d(x,y)/\epsilon}$  and function  $T = \log \frac{d\pi}{d\xi}$ . By construction,  $T$  satisfies  $\mathbb{E}_\xi[e^T] = \int d\pi = 1$ .

Without loss of generality, we assume that  $\pi$  makes the minimum of  $\mathbb{E}_\pi[K] - \log(\mathbb{E}_\xi[e^K])$  appeared in (??). Then

$$\begin{aligned} \mathcal{W}_\epsilon(\mu, \nu) - \mathcal{S}_{\mathcal{H},\epsilon}(\mu, \nu) &\leq \epsilon (\mathbb{E}_\pi[T] - \log(\mathbb{E}_\xi[e^T])) - \epsilon (\mathbb{E}_\pi[K] - \log(\mathbb{E}_\xi[e^K])) \text{ by (31) and (??)} \\ &= \epsilon ((\mathbb{E}_\pi[T] - \log 1) - \mathbb{E}_\pi[K] + \log(\mathbb{E}_\xi[e^K])) \\ &= \epsilon ((\mathbb{E}_\pi[T] - \mathbb{E}_\pi[K]) + \log(\mathbb{E}_\xi[e^K])) \\ &\leq \epsilon ((\mathbb{E}_\pi[T] - \mathbb{E}_\pi[K]) + (\mathbb{E}_\xi[e^K] - 1)) \\ &= \epsilon ((\mathbb{E}_\pi[T - K]) + (\mathbb{E}_\xi[e^K - e^T])) \end{aligned} \quad (32)$$

where we used the inequality  $\log x \leq x - 1$ .

**Step 2.** Fix  $\eta > 0$ . We first consider the case where  $\|T\| \leq M$  is bounded. By the universal approximation theorem [2], we can choose a kernel function  $K \leq M$  such that

$$\mathbb{E}_\pi |T - K| \leq \frac{\eta}{2} \quad \text{and} \quad \mathbb{E}_\xi |T - K| \leq \frac{\eta}{2} e^{-M} \quad (33)$$

Since  $\exp$  is Lipschitz continuous with constant  $e^M$  on  $(-\infty, M]$ , we have

$$\mathbb{E}_\xi |e^T - e^K| \leq e^M \mathbb{E}_\xi |T - K| \leq \frac{\eta}{2} \quad (34)$$

From (32)-(34) and the triangular inequality, we then obtain

$$|W_\epsilon(\mu, \nu) - \mathcal{S}_{\mathcal{H}, \epsilon}(\mu, \nu)| \leq \epsilon (|\mathbb{E}_\pi [T - K]| + |\mathbb{E}_\xi [e^T - e^K]|) \leq \epsilon \eta \quad (35)$$

which proves (30).

**Step 3.** In this step, we are interested in bounding the error made when approximating  $W(\mu, \nu)$  with  $\mathcal{S}_{\mathcal{H}, \epsilon}(\mu, \nu)$ . Assume  $\mathcal{X}$  is the subsets of  $\mathbb{R}^d$ , the diameter  $|\mathcal{X}| = \sup \{\|x - x'\| \mid x, x' \in \mathcal{X}\} \leq D$  and the cost function is  $L$ -Lipschitz. Then it holds [1]

$$\mathcal{W}_\epsilon(\mu, \nu) - \mathcal{W}(\mu, \nu) \leq 2\epsilon d \log \frac{e^2 LD}{\sqrt{d}\epsilon} \quad (36)$$

From (35), (36) and the triangular inequality, we then obtain

$$|\mathcal{S}_{\mathcal{H}, \epsilon}(\mu, \nu) - \mathcal{W}(\mu, \nu)| \leq \epsilon \left( \eta + 2d \log \frac{e^2 LD}{\sqrt{d}\epsilon} \right) \quad (37)$$

□

## 6. Proving Theorem 3

**Theorem 3** (asymptotic bound). *The Hilbert Sinkhorn estimator  $\mathcal{S}_{\mathcal{H}, \epsilon}(\mu_n, \nu_n)$  approximates the Wasserstein distance  $W(\mu, \nu)$  with the following bound,*

$$\forall n \geq N, \mathbb{P} (|\mathcal{S}_{\mathcal{H}, \epsilon}(\mu_n, \nu_n) - W(\mu, \nu)| \leq \zeta) = 1 \quad (38)$$

where  $\zeta = 2\epsilon \left( \eta + d \log \frac{e^2 LD}{\sqrt{d}\epsilon} \right)$ .

*Proof.* Let  $\eta > 0$ . We find a kernel function and  $N > 0$  such that (24) and (30) hold. By the triangular inequality, for all  $n \geq N$  and with probability one, we have:

$$|\mathcal{S}_{\mathcal{H}, \epsilon}(\mu_n, \nu_n) - W(\mu, \nu)| \leq |\mathcal{S}_{\mathcal{H}, \epsilon}(\mu_n, \nu_n) - \mathcal{S}_{\mathcal{H}, \epsilon}(\mu, \nu)| + |\mathcal{S}_{\mathcal{H}, \epsilon}(\mu, \nu) - W(\mu, \nu)| \leq \zeta$$

where  $\zeta = 2\epsilon \left( \eta + d \log \frac{e^2 LD}{\sqrt{d}\epsilon} \right)$  □

## 7. Proving Theorem 4

**Lemma 1.** [6] *We assume that arbitrary function  $f \in \mathcal{H}$  is bounded (i.e.,  $\|f\|_{\mathcal{H}} \leq M$ ). Given the covering disk  $B_\eta = \{f \in \mathcal{H} : \|f\|_{\mathcal{H}} \leq \eta\}$ , the covering number of  $\mathcal{H}$  is*

$$\mathcal{N}(\mathcal{H}, \eta) \leq \left( \frac{3M}{\eta} \right)^m \quad (39)$$

where  $m$  is the number of basis that span the function  $f$ .

**Theorem 4.** *Given the desired accuracy parameters  $\eta, \epsilon > 0$  and the confidence parameter  $\delta$ , we have,*

$$\mathbb{P} (|\mathcal{S}_{\mathcal{H}, \epsilon}(\mu, \nu) - \mathcal{S}_{\mathcal{H}, \epsilon}(\mu_n, \nu_n)| \leq \epsilon \eta) \geq 1 - \delta, \quad (40)$$

whenever the number  $n$  of samples satisfies

$$n \geq \frac{2M^2 (\log(2/\delta) + m \log(24M/\eta))}{\eta^2} \quad (41)$$

where  $m$  and  $M$  are given in Lem. 1.

*Proof.* Assume functional  $T$  is  $M$ -bounded and  $L$ -Lipschitz in reproducing kernel Hilbert space. By Hoeffding inequality, for all function  $|f| \leq M$

$$\Pr \left( |\mathbb{E}_{\mu} f - \mathbb{E}_{\mu_n} f| > \frac{\eta}{4} \right) \leq 2 \exp \left( -\frac{\eta^2 n}{2M^2} \right) \quad (42)$$

To extend this inequality to a uniform inequality over all functions  $T$  and  $e^T$ , the standard technique is to choose a minimal cover of Hilbert space by a finite set of small balls with radius  $\eta$ . We need to choose a minimal cover number of the domain  $B_R = \{T \in \mathcal{H} : \|T\|_{\mathcal{H}} \leq R\}$  by a finite set of small balls with radius  $\eta$  such that  $B_R \subset \bigcup_j B_{\eta}(T_j)$ . As given in Lemma 1, the minimal cardinality of such covering is bounded by the covering number such that

$$\mathcal{N}(\mathcal{H}, \eta) \leq \left( \frac{3M}{\eta} \right)^m \quad (43)$$

Successively applying the union bound in (42) with the set of functions  $\{T_j\}$  to get

$$\Pr \left( \sup_j |\mathbb{E}_{\pi_{\phi}} [T_j] - \mathbb{E}_{\pi_{\phi, n}} [T_j]| \geq \frac{\eta}{4} \right) \leq 2\mathcal{N}(\mathcal{H}, \eta) \exp \left( -\frac{\eta^2 n}{2M^2} \right) < \delta \quad (44)$$

which gives

$$\Pr \left( \sup_j |\mathbb{E}_{\pi_{\phi}} [T_j] - \mathbb{E}_{\pi_{\phi, n}} [T_j]| \leq \frac{\eta}{4} \right) > 1 - \delta \quad (45)$$

We now choose small ball radius  $\lambda = \eta/8L$ . Then solving  $2\mathcal{N}(\mathcal{H}, \eta) \exp \left( -\frac{\epsilon^2 n}{2M^2} \right) \leq \delta$  for sample number  $n$  in (44) to get

$$n \geq \frac{2M^2(\log(2/\delta) + m \log(24ML/\eta))}{\eta^2} \quad (46)$$

We deduce from (45) and  $L$ -Lipschitz of  $|T - T_j| \leq L\eta = \epsilon/8$ , with probability  $1 - \delta$ , for all  $T$  and  $T_j$

$$\begin{aligned} |\mathbb{E}_{\pi_{\phi}} [T] - \mathbb{E}_{\pi_{\phi, n}} [T]| &\leq |\mathbb{E}_{\pi_{\phi}} [T] - \mathbb{E}_{\pi_{\phi}} [T_j]| + |\mathbb{E}_{\pi_{\phi}} [T_j] - \mathbb{E}_{\pi_{\phi, n}} [T_j]| + |\mathbb{E}_{\pi_{\phi, n}} [T_j] - \mathbb{E}_{\pi_{\phi, n}} [T]| \\ &\leq \frac{\eta}{8} + \frac{\eta}{4} + \frac{\eta}{8} \\ &= \frac{\eta}{2} \end{aligned} \quad (47)$$

Similarly, we also obtain that for all functions  $e^T$ , with probability at least  $1 - \delta$ ,

$$|\log \mathbb{E}_{\xi_{\phi}} [e^T] - \log \mathbb{E}_{\xi_{\phi, n}} [e^T]| \leq \frac{\eta}{2} \quad (48)$$

Finally, using (26) (47) and (48), for all  $T$

$$\begin{aligned} &|S_{\mathcal{H}, \epsilon}(\mu_n, \nu_n) - S_{\mathcal{H}, \epsilon}(\mu, \nu)| \\ &\leq \epsilon \left( \sup_T |\mathbb{E}_{\pi_{\phi, n}} [T] - \mathbb{E}_{\pi_{\phi}} [T]| + \sup_T |\log (\mathbb{E}_{\xi_{\phi}} [e^T]) - \log (\mathbb{E}_{\xi_{\phi, n}} [e^T])| \right) \\ &\leq \epsilon \left( \frac{\eta}{2} + \frac{\eta}{2} \right) \\ &= \epsilon \eta \end{aligned} \quad (49)$$

□

## References

- [1] A. Genevay, L. Chizat, F. Bach, M. Cuturi, and G. Peyré. Sample complexity of sinkhorn divergences. In *The 22nd International Conference on Artificial Intelligence and Statistics*, pages 1574–1583. PMLR, 2019.
- [2] C. A. Micchelli, Y. Xu, and H. Zhang. Universal kernels. *Journal of Machine Learning Research*, 7(Dec):2651–2667, 2006.
- [3] K. Muandet, K. Fukumizu, B. Sriperumbudur, and B. Schölkopf. Kernel mean embedding of distributions: A review and beyond. *arXiv preprint arXiv:1605.09522*, 2016.

- [4] A. Smola, A. Gretton, L. Song, and B. Schölkopf. A hilbert space embedding for distributions. In *International Conference on Algorithmic Learning Theory*, pages 13–31. Springer, 2007.
- [5] I. Tolstikhin, B. K. Sriperumbudur, and K. Muandet. Minimax estimation of kernel mean embeddings. *The Journal of Machine Learning Research*, 18(1):3002–3048, 2017.
- [6] D.-X. Zhou. Capacity of reproducing kernel spaces in learning theory. *IEEE Transactions on Information Theory*, 49(7):1743–1752, 2003.
